# Supplementary material for: Differences in Services Offered by Certified Community Behavioral Health Clinics and Community Mental Health Centers
Source: Atypon-hosted journal article supplement (doi:10.1176/appi.ps.20220211), 2022-09-13
Supplement: appi.ps.20220211.ds001.pdf [file appi.ps.20220211.ds001.pdf]

**Number and proportion of clinics providing services in demonstration and non-demonstration states**

| Services                                         | Demonstration states |            |            |            | Non-demonstration states |            |             |            |
|--------------------------------------------------|----------------------|------------|------------|------------|--------------------------|------------|-------------|------------|
|                                                  | CCBHC                |            | CMHC       |            | CCBHC                    |            | CMHC        |            |
|                                                  | N                    | %          | N          | %          | N                        | %          | N           | %          |
| <b>Services</b>                                  | <b>156</b>           | <b>100</b> | <b>267</b> | <b>100</b> | <b>180</b>               | <b>100</b> | <b>1686</b> | <b>100</b> |
| <b>Outpatient services</b>                       |                      |            |            |            |                          |            |             |            |
| Individual psychotherapy                         | 150                  | 96         | 257        | 96         | 175                      | 97         | 1625        | 96         |
| Couples/family therapy                           | 127                  | 81         | 225        | 84         | 148                      | 82         | 1392        | 83         |
| Group therapy                                    | 144                  | 92         | 239        | 90         | 164                      | 91         | 1521        | 90         |
| Cognitive behavioral therapy                     | 153                  | 98         | 251        | 94         | 173                      | 96         | 1596        | 95         |
| Dialectical behavior therapy                     | 95                   | 61         | 163        | 61         | 112                      | 62         | 1028        | 61         |
| Behavior modification                            | 113                  | 72         | 174        | 65         | 110                      | 61         | 1132        | 67         |
| Substance use disorder treatment                 | 129                  | 83         | 131        | 49         | 152                      | 84         | 1209        | 72         |
| Integrated mental health/substance use treatment | 126                  | 81         | 160        | 60         | 153                      | 85         | 1232        | 73         |
| Trauma therapy                                   | 147                  | 94         | 228        | 85         | 169                      | 94         | 1492        | 88         |
| Activity therapy                                 | 51                   | 33         | 96         | 36         | 50                       | 28         | 492         | 29         |
| EMDR therapy                                     | 71                   | 46         | 71         | 27         | 55                       | 31         | 456         | 27         |
| Antipsychotics                                   | 122                  | 78         | 171        | 64         | 147                      | 82         | 1211        | 72         |
| Assisted outpatient treatment                    | 31                   | 20         | 29         | 11         | 42                       | 23         | 130         | 8          |
| Assertive community treatment                    | 43                   | 28         | 49         | 18         | 80                       | 44         | 394         | 23         |
| Chronic disease/illness management               | 58                   | 37         | 55         | 21         | 46                       | 26         | 293         | 17         |
| Telemedicine/telehealth services                 | 142                  | 91         | 221        | 83         | 153                      | 85         | 1396        | 83         |
| <b>Physical health services</b>                  |                      |            |            |            |                          |            |             |            |
| Hepatitis B testing                              | 21                   | 13         | 13         | 5          | 36                       | 20         | 94          | 6          |
| Hepatitis C testing                              | 28                   | 18         | 13         | 5          | 38                       | 21         | 106         | 6          |
| HIV testing                                      | 18                   | 12         | 14         | 5          | 40                       | 22         | 110         | 7          |
| Sexually transmitted disease testing             | 14                   | 9          | 12         | 4          | 28                       | 16         | 91          | 5          |
| Tuberculosis screening                           | 44                   | 28         | 36         | 13         | 35                       | 19         | 198         | 12         |
| Screening for tobacco use                        | 142                  | 91         | 199        | 75         | 137                      | 76         | 1114        | 66         |
| Smoke/vape/tobacco cessation counseling          | 141                  | 90         | 136        | 51         | 123                      | 68         | 691         | 41         |
| Nicotine replacement therapy                     | 82                   | 53         | 82         | 31         | 63                       | 35         | 310         | 18         |
| Non-nicotine smoke/tobacco cessation medications | 78                   | 50         | 88         | 33         | 70                       | 39         | 340         | 20         |
| Integrated primary care services                 | 78                   | 50         | 68         | 25         | 65                       | 36         | 378         | 22         |
| <b>Psychiatric rehabilitation services</b>       |                      |            |            |            |                          |            |             |            |
| Illness management and recovery                  | 60                   | 38         | 127        | 48         | 82                       | 46         | 555         | 33         |
| Family psychoeducation                           | 133                  | 85         | 200        | 75         | 128                      | 71         | 1217        | 72         |
| Education services                               | 51                   | 33         | 56         | 21         | 55                       | 31         | 376         | 22         |
| Housing services                                 | 63                   | 40         | 74         | 28         | 52                       | 29         | 445         | 26         |
| Supported housing                                | 46                   | 29         | 71         | 27         | 67                       | 37         | 420         | 25         |
| Psychosocial rehabilitation services             | 120                  | 77         | 157        | 59         | 99                       | 55         | 788         | 47         |
| Vocational rehabilitation services               | 53                   | 34         | 38         | 14         | 47                       | 26         | 303         | 18         |
| Supported employment                             | 66                   | 42         | 61         | 23         | 84                       | 47         | 578         | 34         |
| <b>Crisis services</b>                           |                      |            |            |            |                          |            |             |            |
| Psychiatric emergency walk-in                    | 89                   | 57         | 108        | 40         | 98                       | 54         | 810         | 48         |
| Suicide prevention services                      | 134                  | 86         | 174        | 65         | 145                      | 81         | 1300        | 77         |
| Crisis intervention team                         | 134                  | 86         | 157        | 59         | 133                      | 74         | 1187        | 70         |
| Onsite services for psychiatric emergencies      | 86                   | 55         | 108        | 40         | 90                       | 50         | 749         | 44         |
| Offsite services for psychiatric emergencies     | 105                  | 67         | 88         | 33         | 103                      | 57         | 625         | 37         |
| <b>Peer support services</b>                     |                      |            |            |            |                          |            |             |            |
| Consumer-run (peer support) services             | 117                  | 75         | 116        | 43         | 107                      | 59         | 828         | 49         |

| <b>Case management</b>       |     |    |     |    |     |    |      |    |
|------------------------------|-----|----|-----|----|-----|----|------|----|
| Intensive case management    | 53  | 34 | 90  | 34 | 103 | 57 | 713  | 42 |
| Case management              | 137 | 88 | 200 | 75 | 165 | 92 | 1507 | 89 |
| <b>Services for veterans</b> |     |    |     |    |     |    |      |    |
| Veterans                     | 48  | 31 | 51  | 19 | 73  | 41 | 329  | 20 |
| Active-duty military         | 28  | 18 | 23  | 9  | 27  | 15 | 137  | 8  |
| Members of military families | 37  | 24 | 29  | 11 | 47  | 26 | 225  | 13 |

Note: N-MHSS does not differentiate between CCBHCs funded by the CCBHC Medicaid demonstration versus CCBHCs funded through a different mechanism (e.g., state plan amendments, CCBHC Expansion Grants)
